# Supplementary material for: Intrinsic superoxide dismutase activity of MnO nanoparticles enhances the magnetic resonance imaging contrast
Source: Royal Society of Chemistry journal article supplement (doi:10.1039/c6tb02078j), 2016-01-01
Supplement: c6tb02078j1.pdf [file c6tb02078j1.pdf]

## Supporting Information

### **Intrinsic Superoxide Dismutase Activity of MnO Nanoparticles Enhances Magnetic Resonance Imaging Contrast**

Ruben Ragg,<sup>a</sup> Anna M. Schilmann,<sup>a</sup> Karsten Korschelt,<sup>a</sup> Christian Wieseotte,<sup>b</sup> Martin Klueker,<sup>a</sup> Melanie Viel,<sup>a</sup> Lara Völker,<sup>a</sup> Sebastian Preiß,<sup>a</sup> Jana Herzberger,<sup>c,d</sup> Holger Frey,<sup>c</sup> Katja Heinze,<sup>a</sup> Peter Blümler,<sup>e</sup> Muhammad N. Tahir,<sup>a</sup> Filipe Natalio,<sup>f</sup> and Wolfgang Tremel<sup>a\*</sup>

<sup>a</sup> Institute of Inorganic and Analytical Chemistry, Johannes Gutenberg University Mainz, Duesbergweg 10–14, 55128 Mainz, Germany. \* email: tremel@uni-mainz.de

<sup>c</sup> Section of Medical Physics, University Medical Center, Johannes Gutenberg University Mainz, Langenbeckstr. 1, 55131 Mainz, Germany.

<sup>c</sup> Institute of Organic Chemistry, Johannes Gutenberg University Mainz, Duesbergweg 10–14, 55128 Mainz, Germany.

<sup>d</sup> Graduate School Materials Science in Mainz, Staudinger Weg 9, 55128 Mainz, Germany.

<sup>e</sup> Institute of Physics, Johannes Gutenberg University Mainz, Staudingerweg 7, 55128 Mainz, Germany.

<sup>f</sup> Institute of Chemistry - Inorganic Chemistry, Kurt Mothes-Str. 2, Martin-Luther-Universität Halle-Wittenberg, 06120 Halle, Germany.

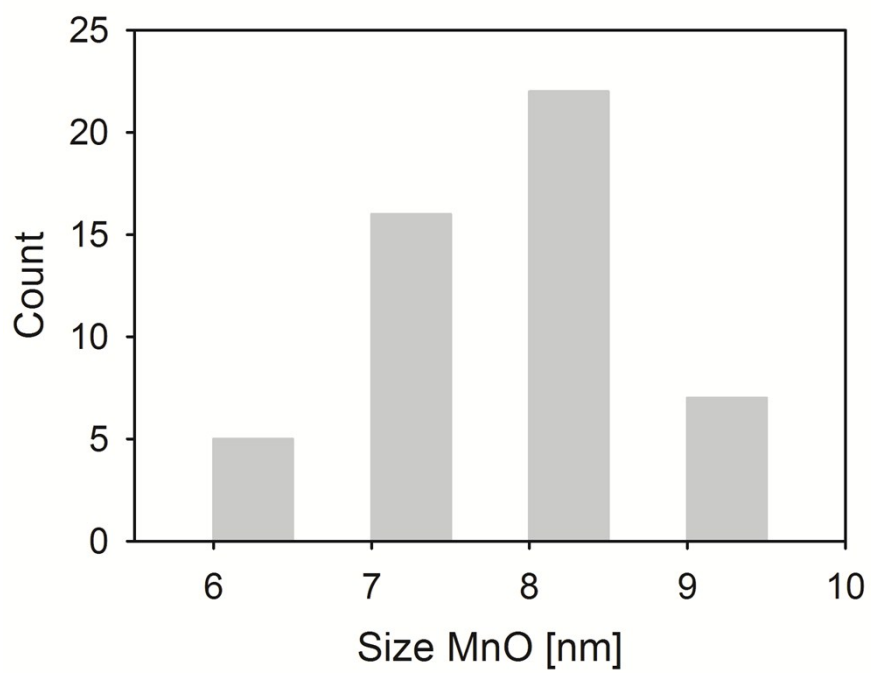

**Fig. S1. Size distribution for MnO NPs** determined by TEM (size of 50 individual NPs), revealing an average diameter of  $7.6 \pm 0.7$  nm.

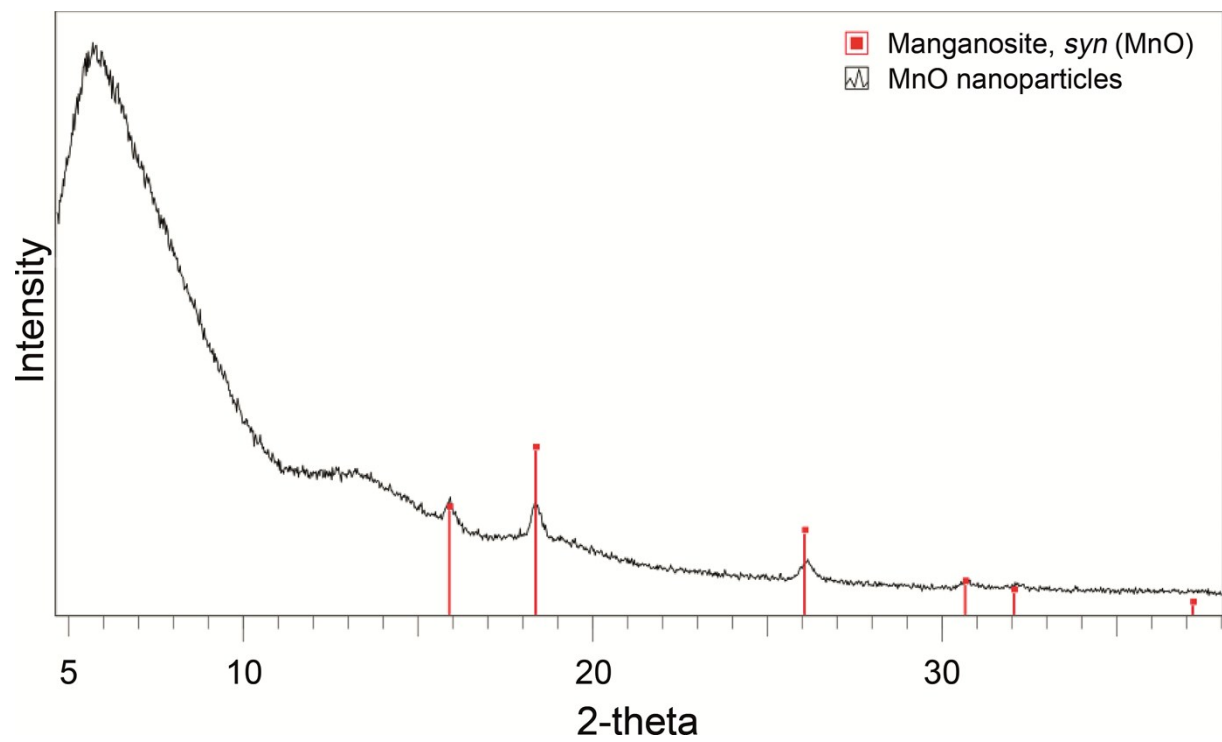

**Fig. S2. P-XRD of MnO NPs** (black) showing the formation of phase-pure face-centered cubic manganosite, *syn*-MnO (red).

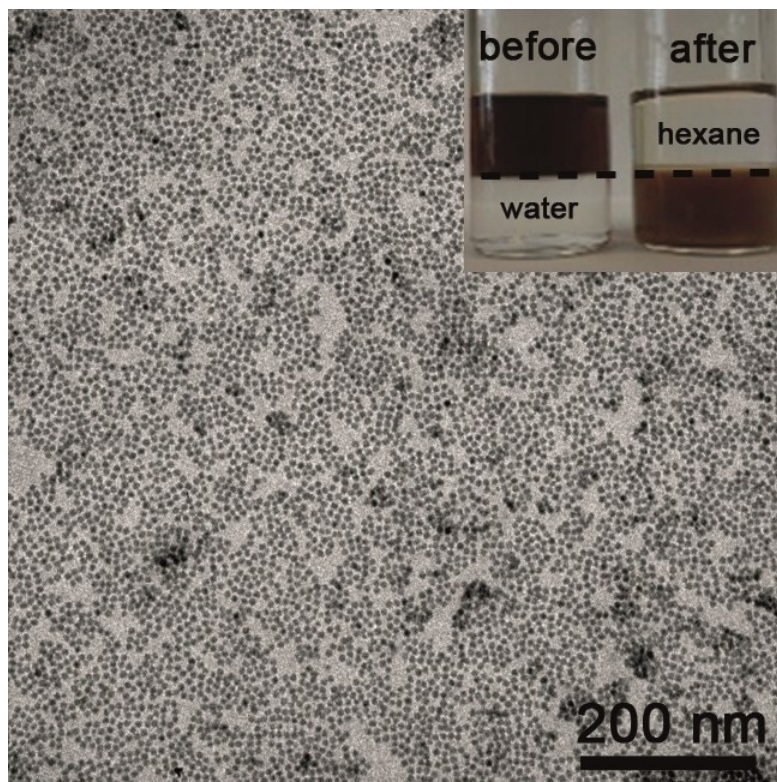

**Fig. S3. Water soluble surface functionalized 8 nm MnO NPs with C-PEG.** NPs retain size and shape during the functionalization process. Scale bar: 200 nm. Inset: Phase transfer of the MnO NPs in hexane/water before (left) and after (right) the functionalization with C-PEG.

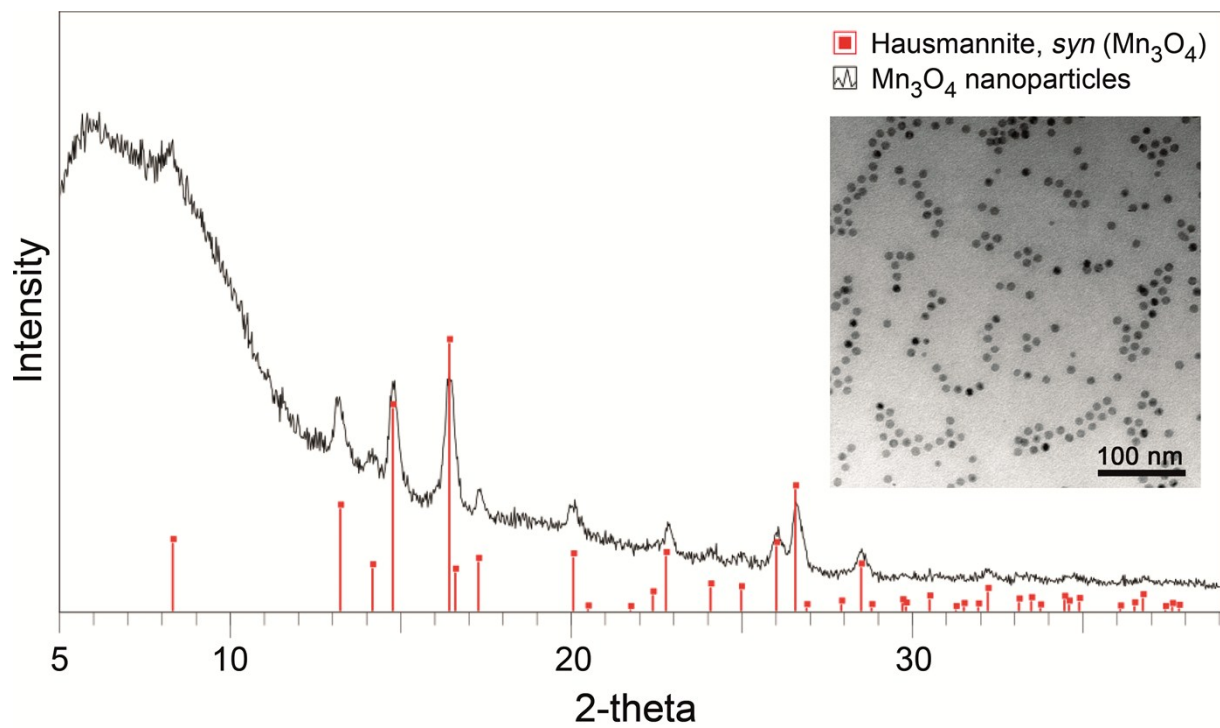

**Fig. S4. Synthesis of Mn<sub>3</sub>O<sub>4</sub> NPs.** P-XRD of Mn<sub>3</sub>O<sub>4</sub> NPs (black) showing the formation of phase-pure body-centered tetragonal hausmannite, *syn*-Mn<sub>3</sub>O<sub>4</sub> (red). Inset: TEM Image of monodisperse 8 nm Mn<sub>3</sub>O<sub>4</sub> NPs. Scale bar: 100 nm.

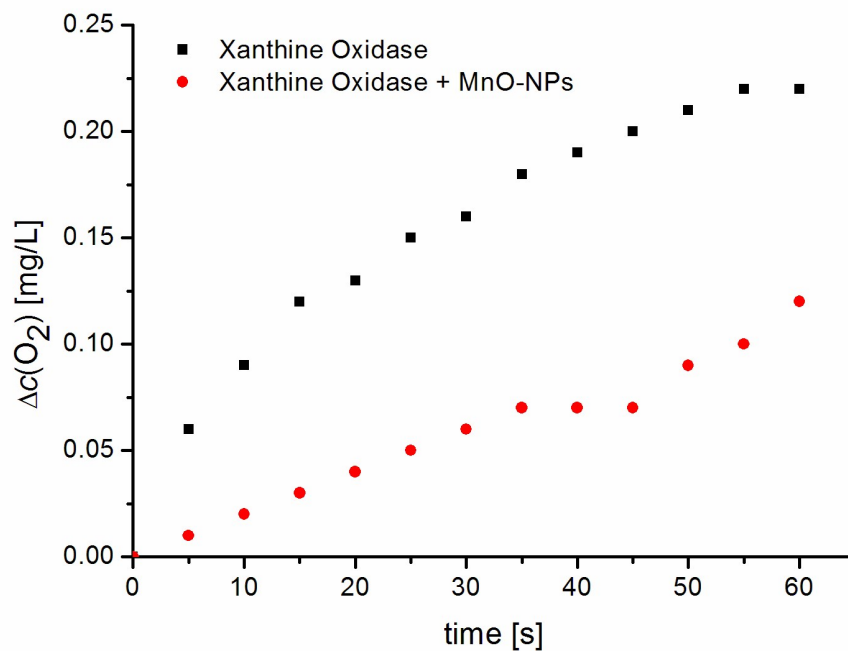

**Fig. S5. Oxygen evolution of MnO NPs** when exposed to superoxide radicals generated by xanthine/xanthine oxidase (XO) without addition of cytochrome c (pH 7.4). Molecular oxygen ( $\text{O}_2$ ) is depleted by enzymatic activity of XO (black) forming superoxide radicals. In general superoxide dismutation by SOD-active materials leads to the formation of hydrogen peroxide and oxygen (50% each). MnO NPs reduce the oxygen depletion to approx. 50% (red), which is equivalent to the formation of an equivalent amount of  $\text{O}_2$ .

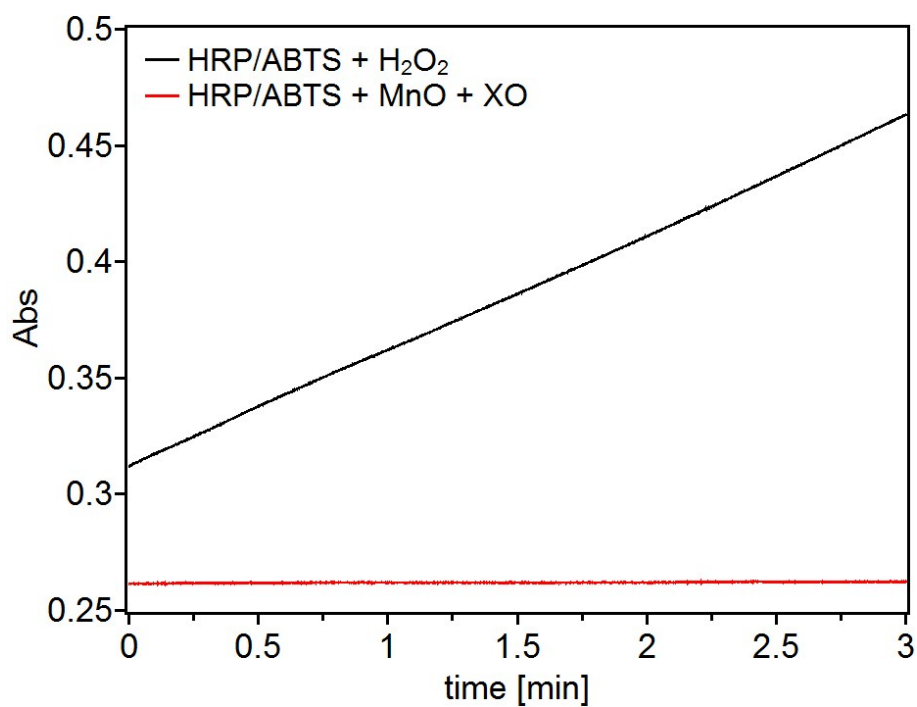

**Fig. S6.** Formation of H<sub>2</sub>O<sub>2</sub> during the SOD-reaction of MnO NPs (red) cannot be demonstrated using the classical HRP/ABTS assay due to the intrinsic catalase-like activity of MnO NPs. As a positive control H<sub>2</sub>O<sub>2</sub> has been added to the reaction mixture without addition of MnO (black).

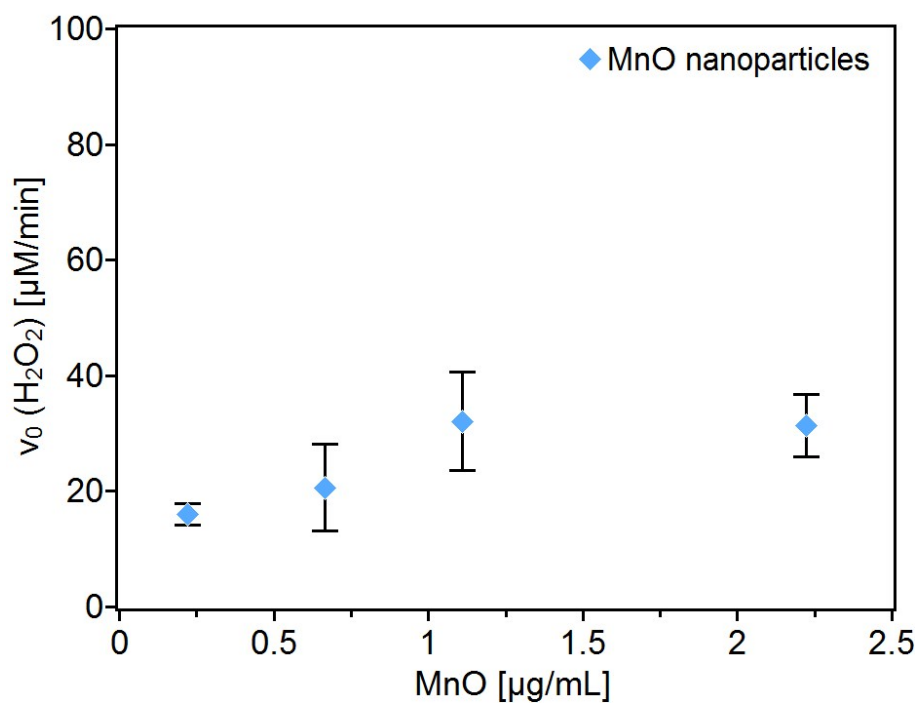

**Fig. S7. Catalase-like reaction of MnO NPs** monitored by disappearance of peroxide at 240 nm for 3 min at RT. Concentrations of 10mM H<sub>2</sub>O<sub>2</sub> and 50 mM PBS pH 7.4 were used, while varying amounts of MnO nanoparticles (0.2, 0.7, 1.1, 2.2 µg/mL).



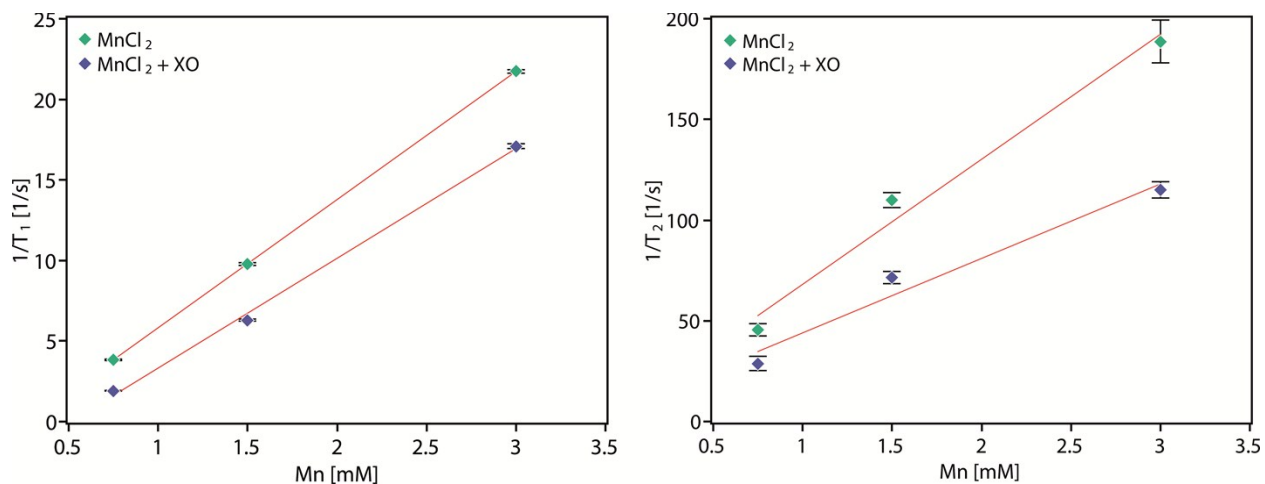

**Fig. S8. Specific relaxivities  $r_1$  and  $r_2$  of  $\text{Mn}^{2+}$  ion a without and b with addition of superoxide generated by xanthine/xanthine oxidase (XO).** Relaxivities were determined by linear regression and show values for **a**  $r_1 = 7.95 \pm 0.01 \text{ mM}^{-1}\text{s}^{-1}$  and  $r_2 = 62.07 \pm 8.26 \text{ mM}^{-1}\text{s}^{-1}$ , **b**  $r_1 = 6.81 \pm 0.34 \text{ mM}^{-1}\text{s}^{-1}$  and  $r_2 = 36.95 \pm 6.88 \text{ mM}^{-1}\text{s}^{-1}$ , respectively.

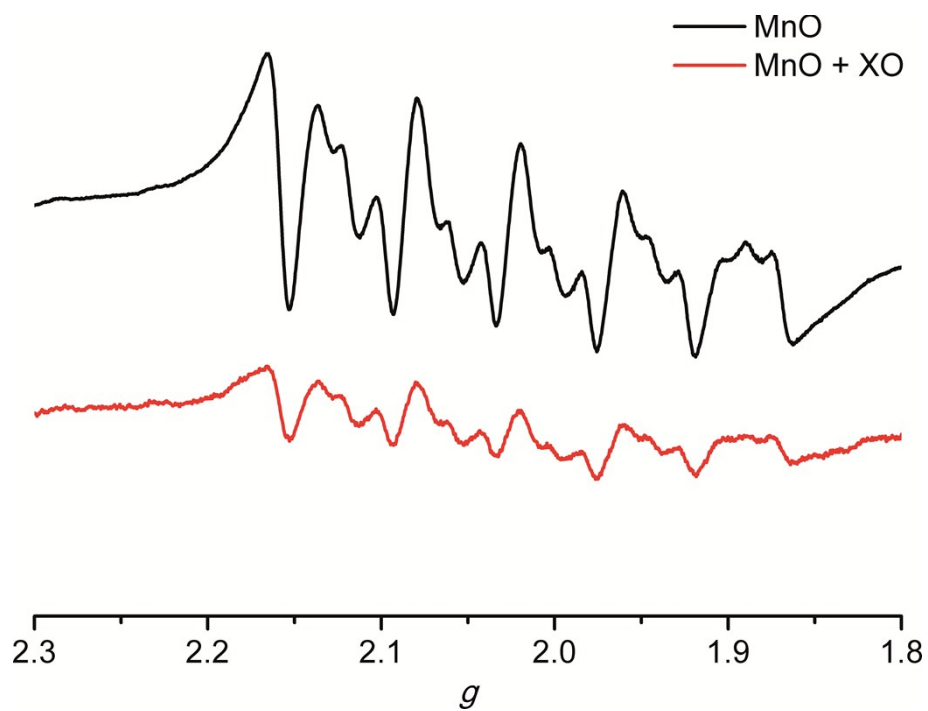

**Fig. S9. X-band EPR spectra of MnO NPs** in a frozen 50/50 mixture water/glycerol (77 K, 9.4 GHz) without (black) and with addition of superoxide generated by xanthine/xanthine oxidase (XO, red) after 30 min. Both spectra show the characteristic anisotropic six line pattern of Mn<sup>2+</sup> (<sup>55</sup>Mn;  $I = 5/2$ ; 100%) with a reduction in signal intensity due to the superoxide treatment (red).
